# Supplementary material for: Synergetic effects of DNA methylation and histone modification during mouse induced pluripotent stem cell generation
Source: PubMed Central journal article supplement (PMC5290738; doi:10.1038/srep39527), 2017-02-03
Supplement: srep39527-s1.pdf [file srep39527-s1.pdf]

## *Supplementary Information*

### **Synergetic effects of DNA methylation and histone modification during mouse induced pluripotent stem cell generation**

Guiying Wang<sup>1</sup>, Rong Weng<sup>1</sup>, Yuanyuan Lan<sup>1</sup>, Xudong Guo<sup>1</sup>, Qidong Liu<sup>1</sup>, Xiaoqin Liu<sup>1</sup>,  
Chenqi Lu<sup>2,\*</sup>, Jiuhong Kang<sup>1,\*</sup>

<sup>1</sup> Clinical and Translational Research Center of Shanghai First Maternity and Infant Health Hospital, Collaborative Innovation Center for Brain Science, Shanghai Key Laboratory of Signaling and Disease Research, School of Life Science and Technology, Tongji University, Shanghai, PR China.

<sup>2</sup> Department of Biostatistics and Computational Biology, State Key Laboratory of Genetic Engineering, School of Life Sciences, Fudan University, Shanghai, PR China.

\*Corresponding authors: Chenqi Lu (email: [luchenqi@fudan.edu.cn](mailto:luchenqi@fudan.edu.cn)) or Jiuhong Kang (email: [jhkang@tongji.edu.cn](mailto:jhkang@tongji.edu.cn)).

**The supplementary information included Figure S1-S3 and Table S1.**

Supplementary Figure S1. The analysis workflow for RNA sequencing data.

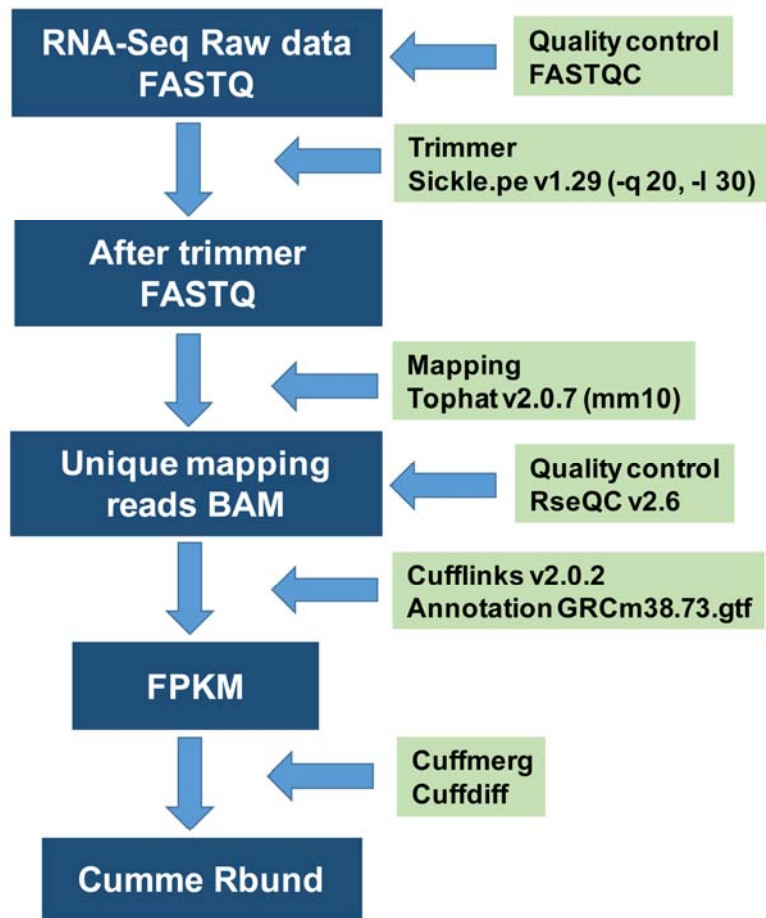

**Supplementary Figure S2. Detailed development process among enriched GO terms of DEGs affected by demethylation.**

(a) Development associated GO terms enrichment of DEGs between OSKM+shDnmt3a-iPSC and OSKM-iPSC.

(b) Development associated GO terms enrichment of DEGs between OSKM+miR-29b-iPSC and OSKM-iPSC.

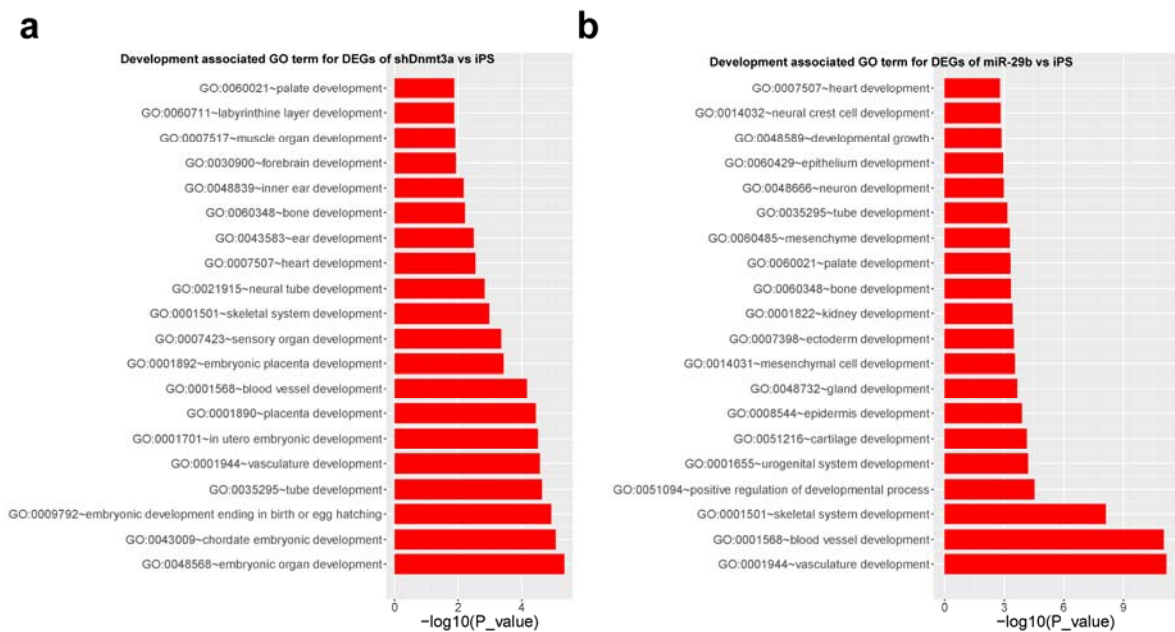

**Supplementary Figure S3. Analysis for the methylation status of 238 stem cells associated genes with by voiplot.**

- (a) A vioplot of the distribution of CpG methylation upstream and within the gene body for 238 stem cells associated genes affected by shDnmt3a.
- (b) A vioplot of the distribution of CpG methylation upstream and within the gene body for 238 stem cells associated genes affected by miR-29b. WT, wild-type ES cells; Dnmt3aKO, knockout of Dnmt3a; Dnmt3bKO, knockout of Dnmt3b; DnmtDKO, knockout of Dnmt3a/3b.

**a**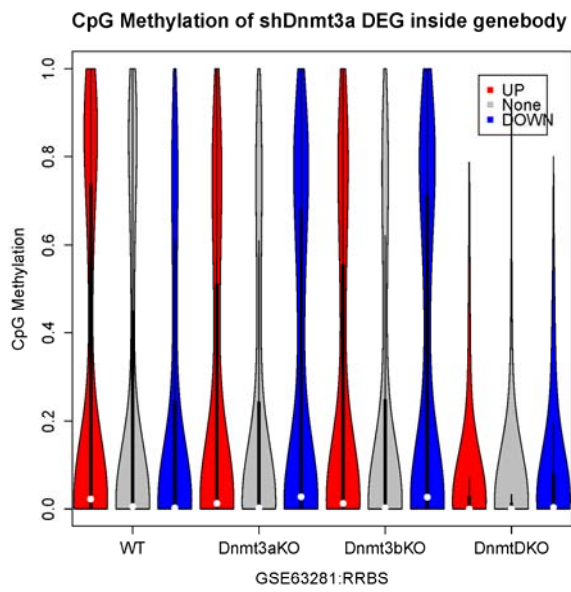

CpG Methylation of shDnmt3a DEG upstream

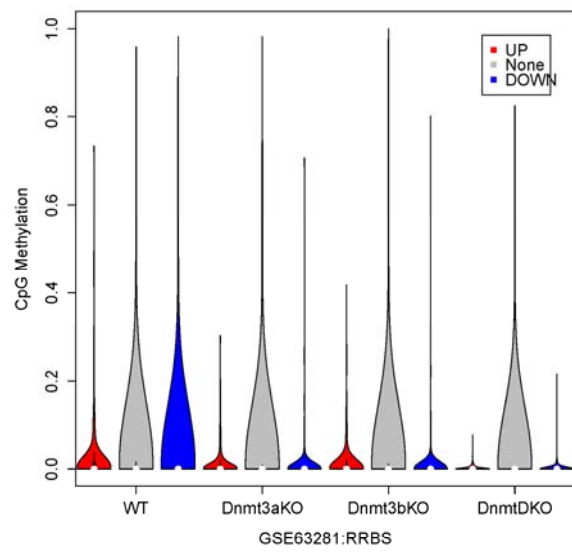**b**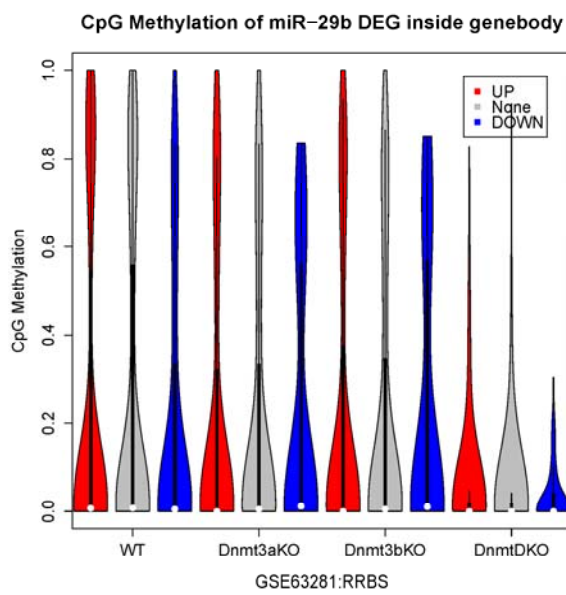

CpG Methylation of miR-29b DEG upstream

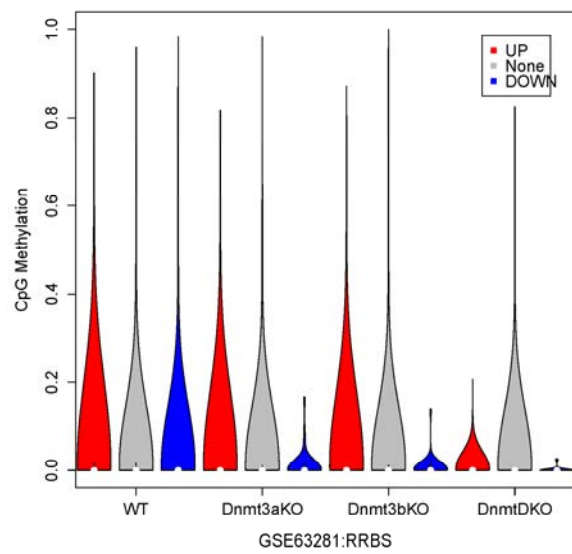

**Supplementary Table S1. The summary of RNA-seq mapping results before and after trimming.**

|                | Items                        | iPSCs    |          |              |               |
|----------------|------------------------------|----------|----------|--------------|---------------|
|                |                              | ES       | OSKM     | OSKM+miR-29b | OSKM+shDnmt3a |
| Raw data       | NO. of paired reads          | 29600950 | 33203284 | 33547683     | 31659928      |
|                | Length                       | 100      | 100      | 100          | 100           |
|                | GC%                          | 53       | 52       | 51/52        | 53            |
| Tophat         | Unique mapped reads          | 10644037 | 12993441 | 13870191     | 11554076      |
|                | Mapped in pairs              | 2630890  | 3323642  | 3715850      | 2986708       |
| After trimming | NO. of paired reads          | 16485482 | 18893004 | 19565387     | 17101260      |
|                | Length                       | 30-100   | 30-100   | 30-100       | 30-100        |
|                | GC%                          | 50       | 49       | 49           | 50            |
|                | No. of single reads          | 6429415  | 7081491  | 7067005      | 6739169       |
|                | Length                       | 30-100   | 30-100   | 30-100       | 30-100        |
|                | GC%                          | 51       | 51       | 50           | 51            |
|                | Total NO. of reads           | 39400379 | 44867499 | 46197779     | 40941689      |
|                | Usable %                     | 66.55%   | 67.56%   | 68.85%       | 64.66%        |
| Tophat         | Unique mapped reads          | 27048541 | 32035451 | 33400756     | 29026534      |
|                | Mapped in pairs              | 8863714  | 10427406 | 11573606     | 10181962      |
|                | Ratio of Unique mapped reads | 2.54     | 2.47     | 2.41         | 2.51          |
|                | Ratio of mapped in pairs     | 3.37     | 3.14     | 3.11         | 3.41          |
